# Supplementary material for: The influence of a vegetated bar on channel-bend flow dynamics
Source: Copernicus journal article supplement (doi:10.5194/esurf-2017-56), 2017-09-25
Supplement: Supplementary file 1 [file esurf-2017-56-supplement.pdf]

# Supplement

1  
2  
3  
4  
5  
6  
7  
8  
9  
10  
11  
12  
13  
14  
15  
16  
17  
18  
19  
20  
21  
22  
23

## **Channel topography**

Airborne LiDAR was flown by Watershed Sciences, Inc. (now Quantum Spatial) for Missoula County on October 30, 2012 with a Leica ALS60 with 3.83 ground points m<sup>-2</sup>, providing 1-m resolution topography with a RMSE of 0.03 m. Inundated regions (reflected off water) were manually removed. In-channel bathymetry was measured with a Trimble 5700 base station in conjunction with Trimble R7 and 5800 RTK-GPS rover cross-section surveys augmented by Sonarmite echosounder measurements in non-wadeable areas. Monuments used for the LiDAR survey were occupied with the RTK GPS. Horizontal and vertical agreement of < 0.10 m was found. RTK topographic points were interpolated in the downstream direction using iRIC grid creator. All topographic points were combined in iRIC, and a curvilinear orthogonal grid created with an average cell size of 2.5 by 2.5 m for calibration runs, and 5 by 5 m for the remaining runs, with corresponding 841,851 and 210,926 nodes, respectively.

## **Velocity measurements**

Velocity was measured during base flow in 2015 along cross sections in locations where little geomorphic change was observed following topography collection (Fig. 1) using a Teledyne RD Instruments (TRDI) four beam 1200 kHz Rio Grande ADCP mounted to a 12-ft cataraft equipped with rapid RTK GPS rowed manually. Data were collected using single ping ensembles with Bottom Mode 12 and Water Mode 7, similar to the methods described in Rennie and Millar (2004), Rennie and Church (2010), and Venditti et al. (2015) . Velocities from the top 0.5 m and bottom 6 % of the depth were excluded. Velocities were corrected for boat speed with

24 WinRiver II software using bottom tracking. Bed conditions were immobile, so additional  
25 corrections were not necessary.

26 Because velocity profiles were incomplete, data were exported in text format from  
27 WinRiver II, and each ensemble post-processed for depth-averaged velocity ( $\bar{U}$ ) in Matlab  
28 R2012a by regressing velocity ( $U$ ) as a function of log of height above the bed ( $z$ ) to determine  
29 shear velocity ( $u^*$ ) and roughness height ( $z_o$ ) (Bergeron and Abrahams, 1992). Since  $u$  varies as a  
30 function of  $z$ :

$$31 \quad U = \frac{u^*}{\kappa} \ln\left(\frac{z}{z_o}\right) \quad (\text{S1})$$

32 where  $\kappa$  is the von Karman constant (0.41), the regression of  $U$  as a function of  $z$  ( $Uz$ ) yields:

$$33 \quad U = m_{Uz} \ln(z) + c_{Uz} \quad (\text{S2})$$

34 where  $m_{Uz}$  is slope and  $c_{Uz}$  the intercept. Shear velocity,  $u_{*Uz}$ , and roughness height,  $z_{oUz}$ , were  
35 calculated from the regression coefficients:

$$36 \quad u_{*Uz} = \kappa m_{Uz} \quad (\text{S3})$$

$$37 \quad z_{oUz} = \exp(-c_{Uz}/m_{Uz}) \quad (\text{S4})$$

38 Using the law of the wall and our calculated  $u_{*Uz}$  and  $z_{oUz}$ , we calculated  $\bar{U}$  for each ensemble  
39 assuming  $z_m = 0.37H$ , where  $H$  is the total depth:

$$40 \quad \bar{U} = \frac{u_{*Uz}}{\kappa} \ln\left(\frac{z_m}{z_{oUz}}\right) \quad (\text{S5})$$

41 Individual ensembles are noisy (e.g., Rennie and Church, 2010) and we wished to  
42 compare measured  $\bar{U}$  to modeled  $\bar{U}$ . Thus we gridded measured velocities to match model  
43 output, ensuring grid cells were concurrent and orthogonal, and calculated the root mean square  
44 error (RMSE). We compared the RMSE of law-of-the-wall-derived  $\bar{U}$  to a simple average  
45 assuming missing values for the top 0.5 m in each ensemble were equal to the value of  $U$

46 corresponding to the largest  $z$ . Law-of-the-wall-derived  $\bar{U}$  had a lower RMSE, and was thus used  
47 instead of the adjusted average (RMSE  $0.24 \text{ m s}^{-1}$  compared to  $0.33 \text{ m s}^{-1}$ ).

48

## 49 **Floodplain Vegetation**

50 Individual floodplain trees were mapped (Fig. 1) from the airborne LiDAR, from which  
51 vegetation density (#stems  $\text{m}^{-2}$ ), height (m) and diameter (m) were extracted. Vegetation points  
52 were isolated and ground vegetation removed with CloudCompare  
53 (<http://www.danielgm.net/cc/>). The dataset was imported as a las dataset in ArcGIS 10.1 and a 1-  
54 m resolution raster of maximum height created. Crowns were mapped following a workflow  
55 similar to Koch et al. (2006) in ArcGIS 10.1, whereby points were inverted and crowns  
56 delineated in a manner similar to delineating drainage basins, and the maximum height for each  
57 crown extracted as “basin” minima. Crown “basins” were converted to polygons. Method  
58 performance was evaluated by comparing crown polygons to aerial imagery. Nearly every tree  
59 large enough to be captured by the LiDAR was accurate (<5 % false positive). Crown attributes  
60 (centroid, area, and radius) were calculated using the field calculator. Height of each crown was  
61 determined by intersecting centroids with the height raster. Diameter at breast height for each  
62 tree was estimated by assuming a crown-diameter to stem-diameter relationship (Hemery et al.,  
63 2005). Although this is a rough estimate, results were reasonable (mean diameter at breast height  
64 of  $0.20 \pm 0.14 \text{ m}$ ).

65 Vegetation polygons were created by constructing a 15-m bounding polygon. The  
66 polygons were smoothed, gaps removed, and dissolved into a single polygon for each region.  
67 Average polygon attributes were calculated (vegetation density (#stems  $\text{m}^{-2}$ ), height (m),  
68 diameter (m), and  $A_S$  (average flow depth x average diameter at breast height;  $\text{m}^2$  per plant).

69 **List of Terms**

70  $c_{Uz}$  = intercept from regression of  $U$  as a function of  $z$

71  $m_{Uz}$  = slope of regression of  $U$  as a function  $z$

72  $u_*$  = shear velocity

73  $u_{*Uz}$  = shear velocity calculated from regression  $U$  as a function of  $z$

74  $\bar{U}$  = depth-averaged velocity ( $\text{m s}^{-1}$ )

75  $U$  = velocity ( $\text{m s}^{-1}$ )

76  $U_m$  = cross-section mean velocity ( $\text{m s}^{-1}$ )

77  $v$  = stream-normal component of velocity ( $\text{m s}^{-1}$ )

78  $z_m$  = height above bed corresponding to law-of-wall-predicted average velocity

79  $z_o$  = roughness height (m)

80  $z_{oUz}$  = roughness height (m) determined from regressing  $U$  as a function of  $z$

81  $\kappa$  = von Karman constant

82

83

84 **References Cited**

85

86 Bergeron, N. and Abrahams, A.: Estimating shear velocity and roughness length from velocit  
87 profiles, *Water Resour. Res.*, 28(8), 2155–2158, 1992.

88 Hemery, G. E., Savill, P. S. and Pryor, S. N.: Applications of the crown diameter–stem diameter  
89 relationship for different species of broadleaved trees, *For. Ecol. Manage.*, 215(1–3), 285–294,  
90 doi:10.1016/j.foreco.2005.05.016, 2005.

91 Koch, B., Heyder, U. and Weinacker, H.: Detection of Individual Tree Crowns in Airborne Lidar  
92 Data, *Photogramm. Eng. Remote Sens.*, 72(4), 357–363, doi:10.14358/PERS.72.4.357, 2006.

93 Rennie, C. D. and Church, M.: Mapping spatial distributions and uncertainty of water and  
94 sediment flux in a large gravel bed river reach using an acoustic Doppler current profiler, *J.*  
95 *Geophys. Res.*, 115(F3), doi:10.1029/2009JF001556, 2010.

96 Rennie, C. D. and Millar, R. G.: Measurement of the spatial distribution of fluvial bedload  
97 transport velocity in both sand and gravel, *Earth Surf. Process. Landforms*, 29(10), 1173–1193,  
98 doi:10.1002/esp.1074, 2004.

99 Venditti, J. G., Domarad, N., Church, M. and Rennie, C. D.: The gravel-sand transition:  
100 Sediment dynamics in a diffuse extension, *J. Geophys. Res. Earth Surf.*, 120, 1–21,  
101 doi:10.1002/2014JF003328.Received, 2015.

102

103
